# Supplementary material
Source: publisher figshare collection journal article supplement (https://springernature.figshare.com/ndownloader/files/22780790)
Supplement: Supplementary file [file 22780790]

## Appendix 2: Unit costs applied for valuation of resource use

| Description                         | Unit cost | Source                    | Note                                                  |
|-------------------------------------|-----------|---------------------------|-------------------------------------------------------|
| Embedder (per hour)                 | £42       | PSSRU 2016 <sup>1</sup>   | NHS agenda for change band 6                          |
| Diabetes Lead (per hour)            | £25       | PSSRU 2016                | Band 3                                                |
| Administrator (per hour)            | £25       | PSSRU 2016                | Band 4                                                |
| General Practitioner (GP) per hour  | £134      | PSSRU 2016                | With qualification (excluding direct care staff cost) |
| Research staff (per hour)           | £42       | PSSRU 2016                | Band 6                                                |
| GP Nurse (per hour)                 | £43       | PSSRU 2016                | Band 7                                                |
| Research Nurse (per hour)           | £52       | PSSRU 2016                | Band 7                                                |
| Public Health Worker (per hour)     | £32       | PSSRU 2016                | Band 5                                                |
| Diabetes Educator (per hour)        | £25       | PSSRU 2016                | Band 3                                                |
| Voluntary service worker (per hour) | £11       | UK ASHE 2015 <sup>2</sup> | -                                                     |
| Practice Manager (per hour)         | £73       | PSSRU 2016                | Band 8b                                               |

<sup>1</sup> Curtis L, Burns A. Unit Costs of Health and Social Care 2016. Canterbury: PSSRU, University of Kent; 2016. URL: [www.pssru.ac.uk/project-pages/unit-costs/2016/](http://www.pssru.ac.uk/project-pages/unit-costs/2016/) (accessed 11 Dec 2017)

<sup>2</sup> UK Annual Survey of Hours and Earnings (ASHE) 2015. URL: [https://www.wcva.org.uk/media/5625220/10\\_volunteer\\_time\\_as\\_match\\_funding.pdf](https://www.wcva.org.uk/media/5625220/10_volunteer_time_as_match_funding.pdf) (accessed 11 Dec 2017)
